# Supplementary material for: Determination of the chemical equator from GEOS-Chem model simulation: a focus on the tropical western Pacific region
Source: Copernicus journal article supplement (doi:10.5194/acp-23-7075-2023), 2023-06-26
Supplement: Supplementary file 1 [file acp-23-7075-2023-supplement.pdf]

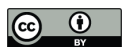

*Supplement of*

## **Determination of the chemical equator from GEOS-Chem model simulation: a focus on the tropical western Pacific region**

**Xiaoyu Sun et al.**

*Correspondence to:* Xiaoyu Sun ([xiaoyu\\_sun@iup.physik.uni-bremen.com](mailto:xiaoyu_sun@iup.physik.uni-bremen.com))

The copyright of individual parts of the supplement might differ from the article licence.

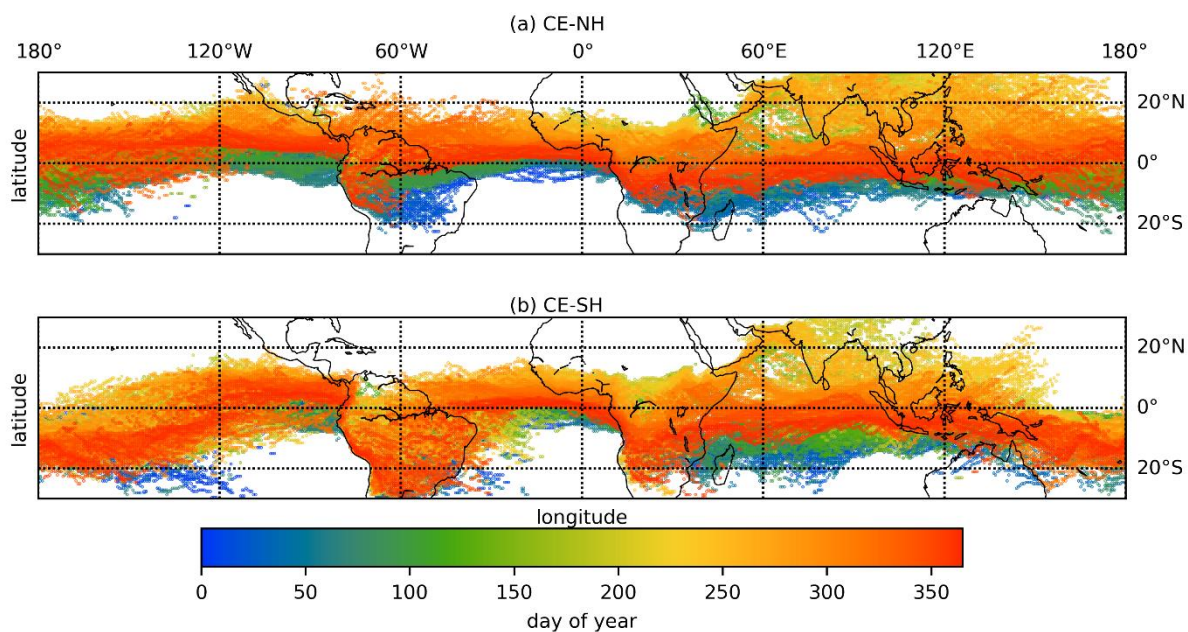

**Figure S1.** Daily CE-NH and CE-SH calculated from model simulations of (a) E1 (tracer released in NH) and (b) E2 (tracer released in SH) in 2016; the color shows the day of the year.

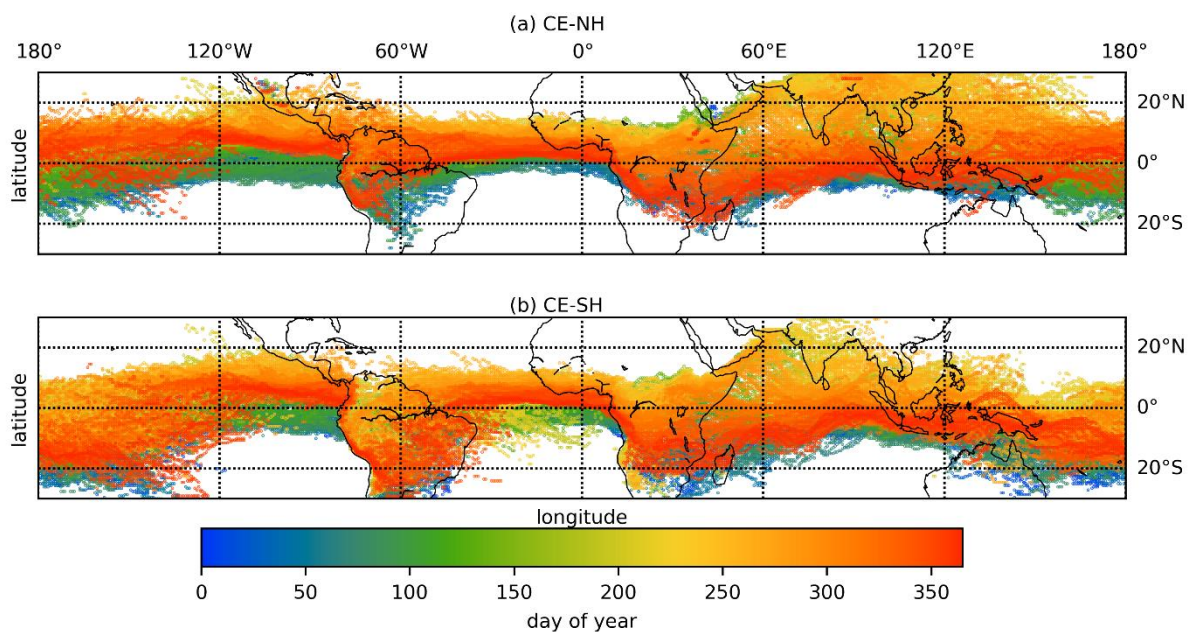

**Figure S2.** Daily CE-NH and CE-SH calculated from model simulations of (a) E1 (tracer released in NH) and (b) E2 (tracer released in SH) in 2017; the color shows the day of the year.

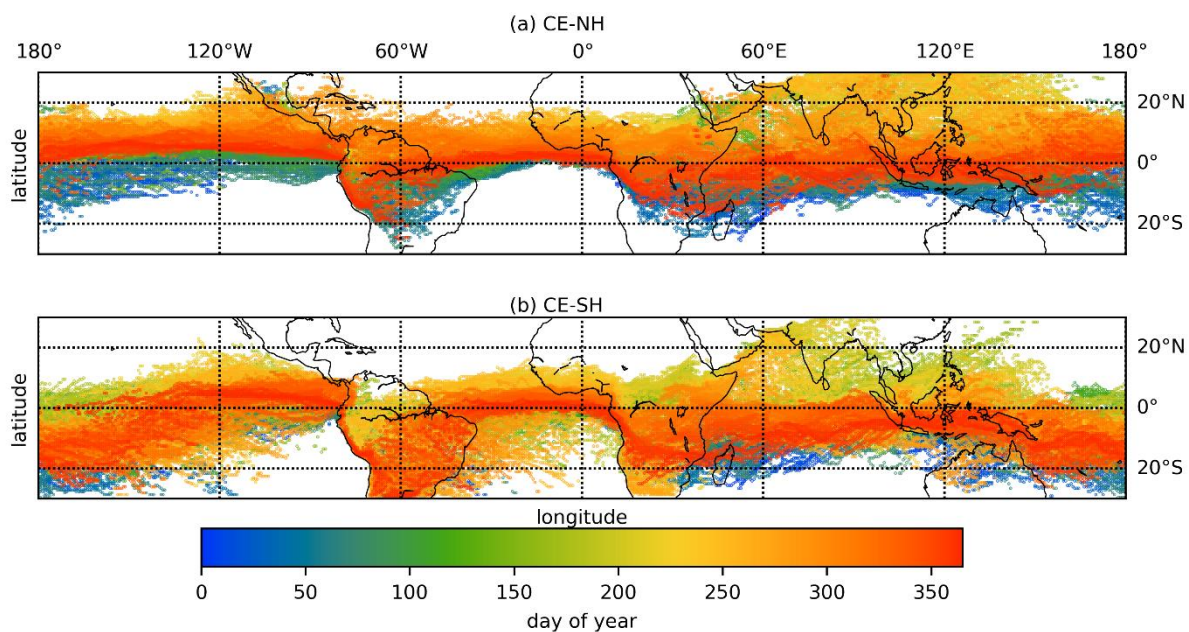

**Figure S3.** Daily CE-NH and CE-SH calculated from model simulations of (a) E1 (tracer released in NH) and (b) E2 (tracer released in SH) in 2018; the color shows the day of the year.

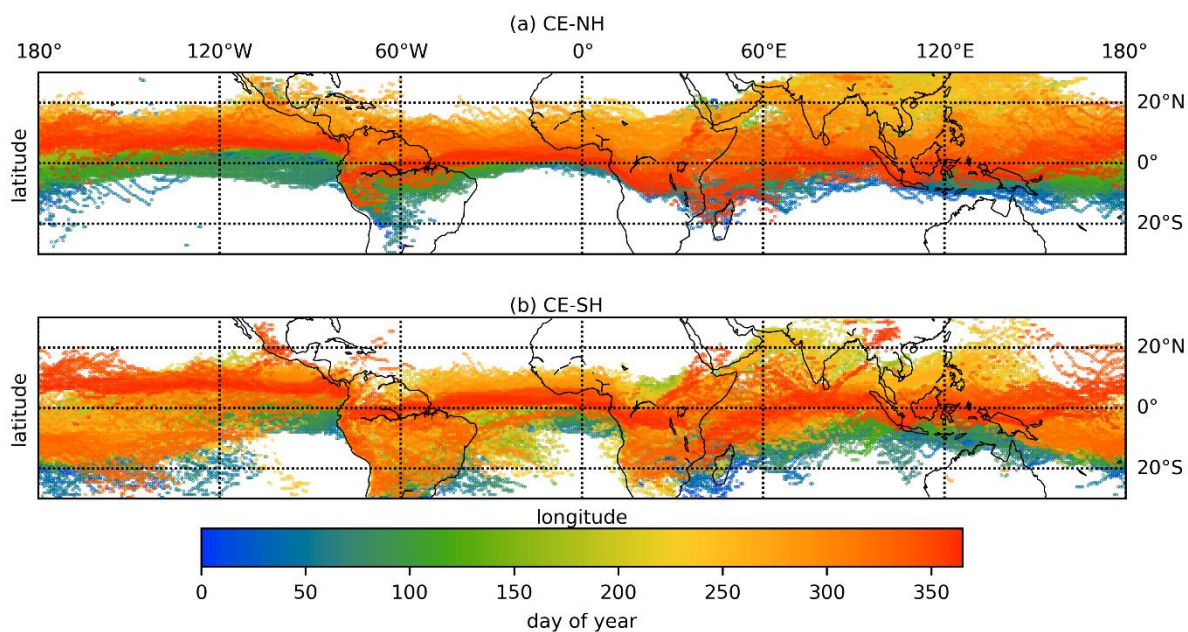

**Figure S4.** Daily CE-NH and CE-SH calculated from model simulations of (a) E1 (tracer released in NH) and (b) E2 (tracer released in SH) in 2019; the color shows the day of the year.

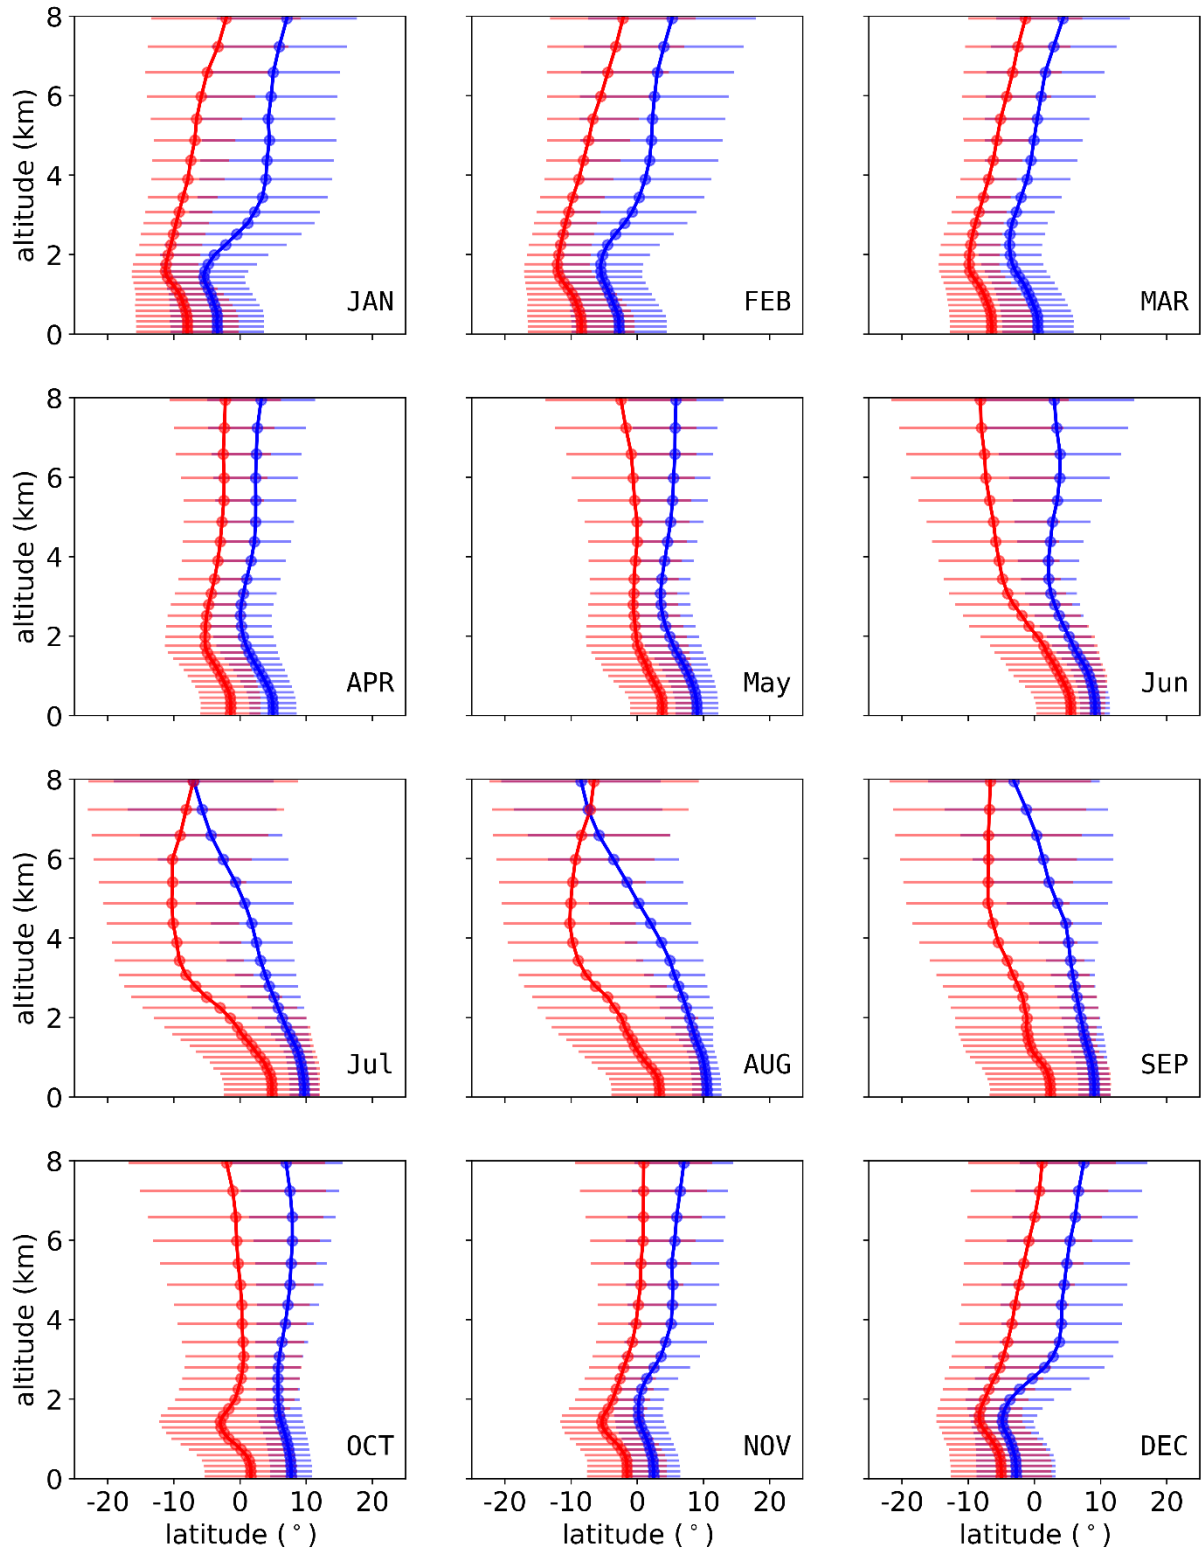

**Figure S5.** Monthly averaged (2015-2019) CE by altitude. The CE-NH / CE-SH are zonally ( $15^{\circ}$  W -  $50^{\circ}$  E) averaged over the AF region see Fig. 5. The blue lines show the CE-NH and the red lines show the CE-SH. Only CE-NH / CE-SH below 8 km are shown here because of the large uncertainty in the higher model level.  $1-\sigma$  of the CE-NH and CE-SH are given in the plots.

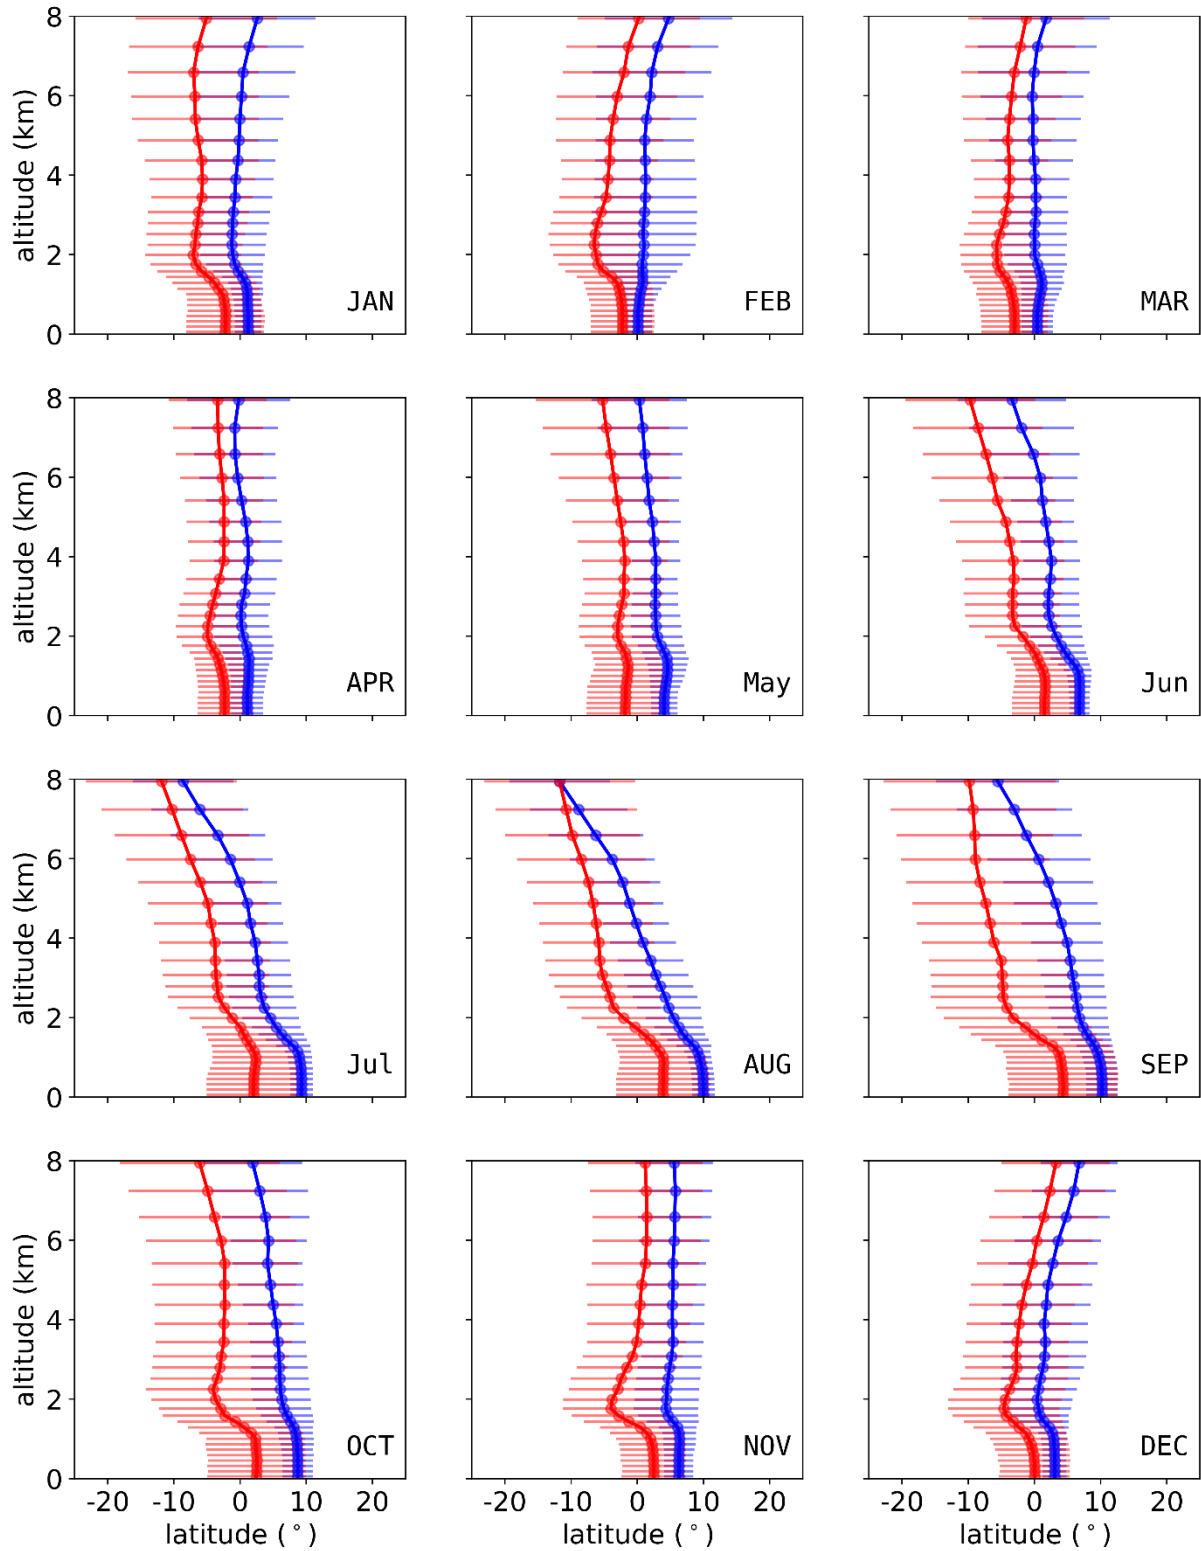

**Figure S6.** Monthly averaged (2015-2019) CE by altitude. The CE-NH / CE-SH are zonally ( $40^{\circ}$  W -  $15^{\circ}$  W) averaged over the AT region see Fig. 5. The blue lines show the CE-NH and the red lines show the CE-SH. Only CE-NH / CE-SH below 8 km are shown here because of the large uncertainty in the higher model level.  $1\text{-}\sigma$  of the CE-NH and CE-SH are given in the plots.

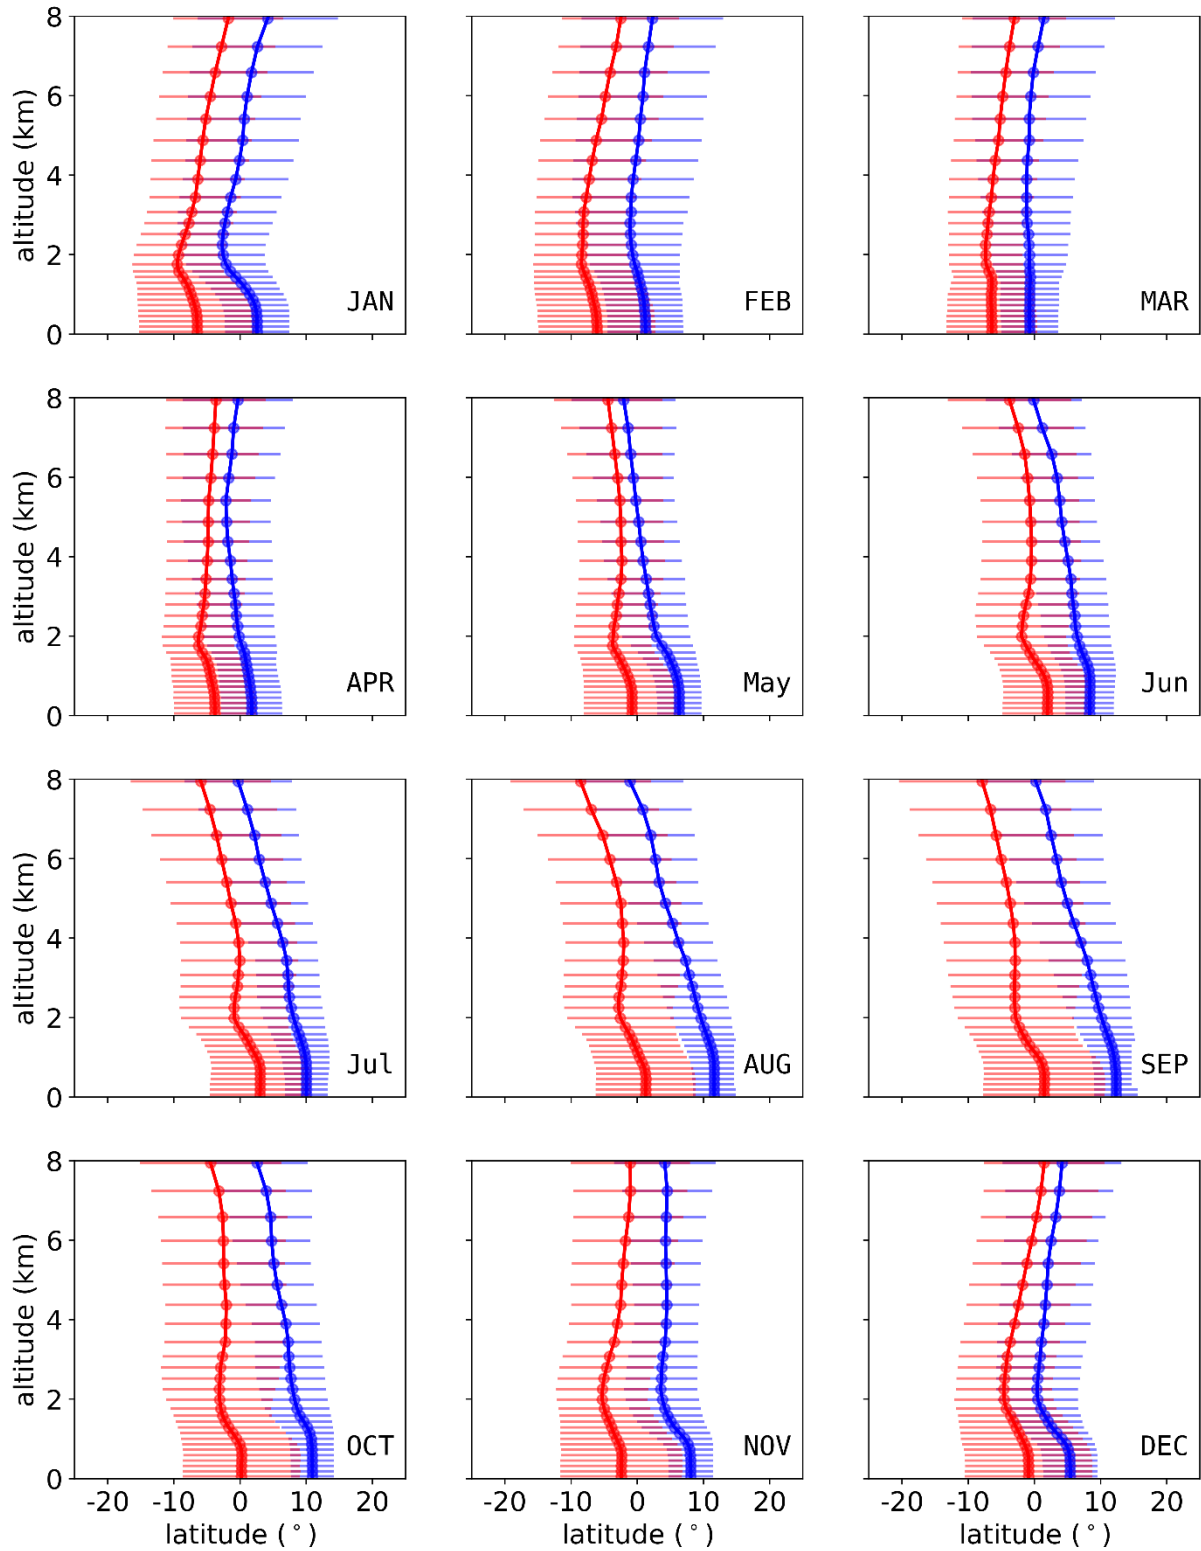

**Figure S7.** Monthly averaged (2015-2019) CE by altitude. The CE-NH / CE-SH are zonally ( $180^{\circ}$  -  $80^{\circ}$  W) averaged over the CEP region see Fig. 5. The blue lines show the CE-NH and the red lines show the CE-SH. Only CE-NH / CE-SH below 8 km are shown here because of the large uncertainty in the higher model level.  $1\text{-}\sigma$  of the CE-NH and CE-SH are given in the plots.

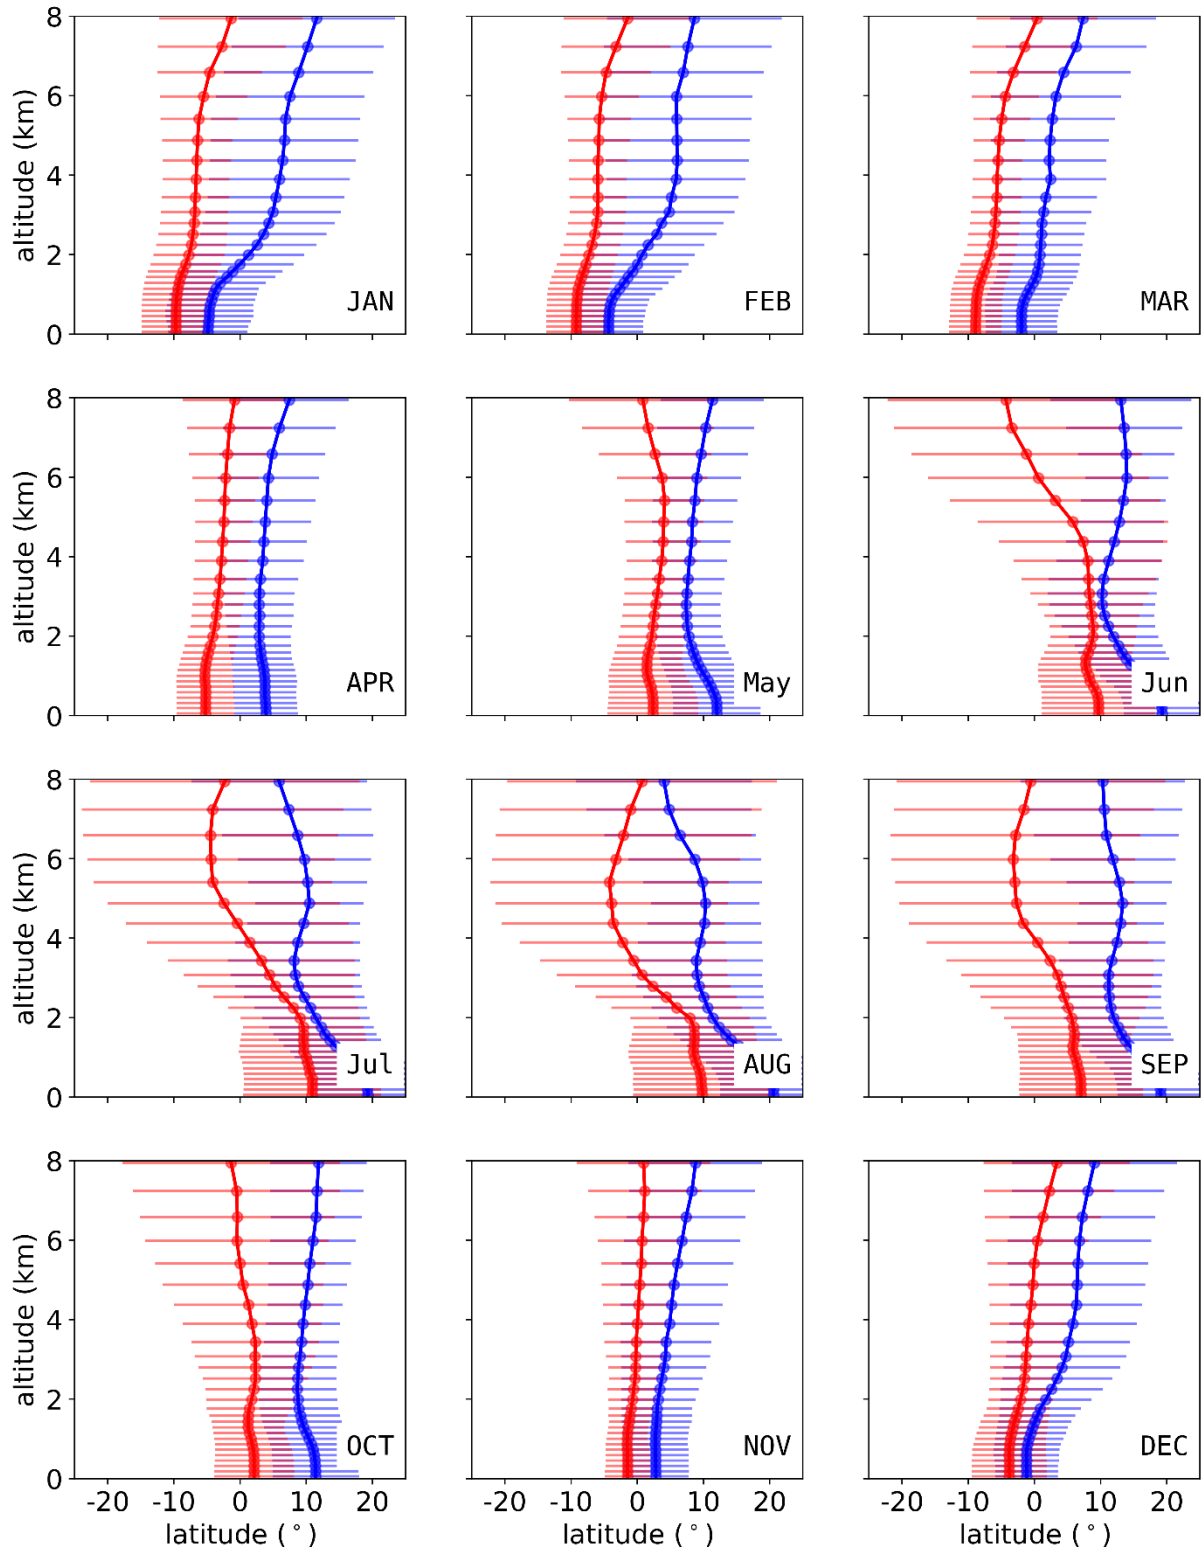

**Figure S8.** Monthly averaged (2015-2019) CE by altitude. The CE-NH / CE-SH are zonally ( $50^{\circ}$  E –  $100^{\circ}$  E) averaged over the IO region see Fig. 5. The blue lines show the CE-NH and the red lines show the CE-SH. Only CE-NH / CE-SH below 8 km are shown here because of the large uncertainty in the higher model level.  $1\text{-}\sigma$  of the CE-NH and CE-SH are given in the plots.

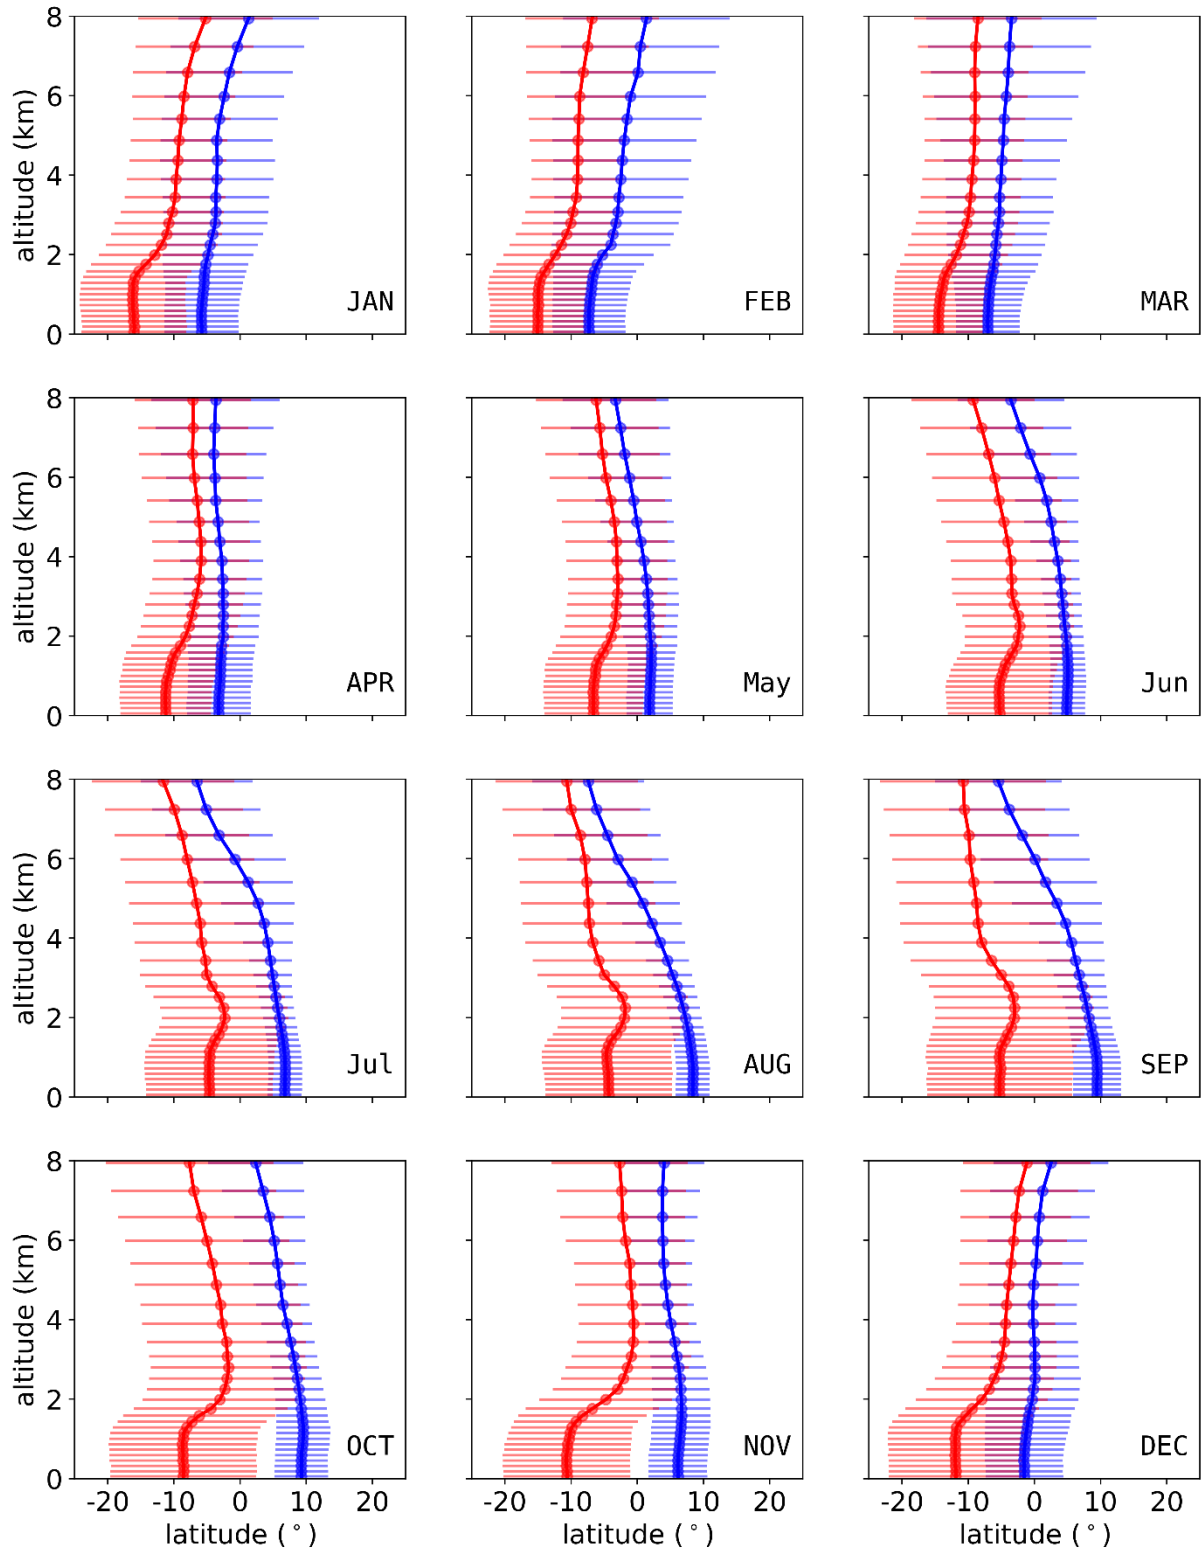

**Figure S9.** Monthly averaged (2015-2019) CE by altitude. The CE-NH / CE-SH are zonally (80° W - 40° W) averaged over the SA region see Fig. 5. The blue lines show the CE-NH and the red lines show the CE-SH. Only CE-NH / CE-SH below 8 km are shown here because of the large uncertainty in the higher model level. 1- $\sigma$  of the CE-NH and CE-SH are given in the plots.
